# Supplementary material for: The use of PanDrugs to prioritize anticancer drug treatments in a case of T-ALL based on individual genomic data
Source: BMC Cancer. 2019 Oct 26;19:1005. doi: 10.1186/s12885-019-6209-9 (PMC6815385; doi:10.1186/s12885-019-6209-9)
Supplement: Supplementary file 1 — Additional file 1: Table S1. Primer list. Description of primers required for Sanger sequencing. [file 12885_2019_6209_MOESM1_ESM.xlsx]

## Sheet: Hoja1
	Supplementary Table 1.- Primer list. Description of primers required for Sanger sequencing .
		Target Gene	Sequence 5'-3'
		WT1	ggagtgtgaatgggagtggt
			atgtttgcccaagactggac
		JAK1	tgttgcccaattgtattcca
			AGGTCAGCCAGCTCCTTACA
		FBXW7	CGTTGCAGGGGCATACTAAT
			tagagccccaaagtgtcagg
		NOTCH1	ACTGCAAGGACCACTTCAGC
			CGTTGCAGGGGCATACTAAT
		CTCF	TTCCAGTGTGAGCTTTGCAG
			taaattcccgctggagtcag
